# Supplementary material for: Neural stem cells restore cognitive function in Parkinsonian macaques
Source: Research Square preprint supplement (doi:10.21203/rs.3.rs-137453/v1), 2021-01-25
Supplement: Supplementary file 1 [file 7771a6babc8be57bc30bd82a.docx]

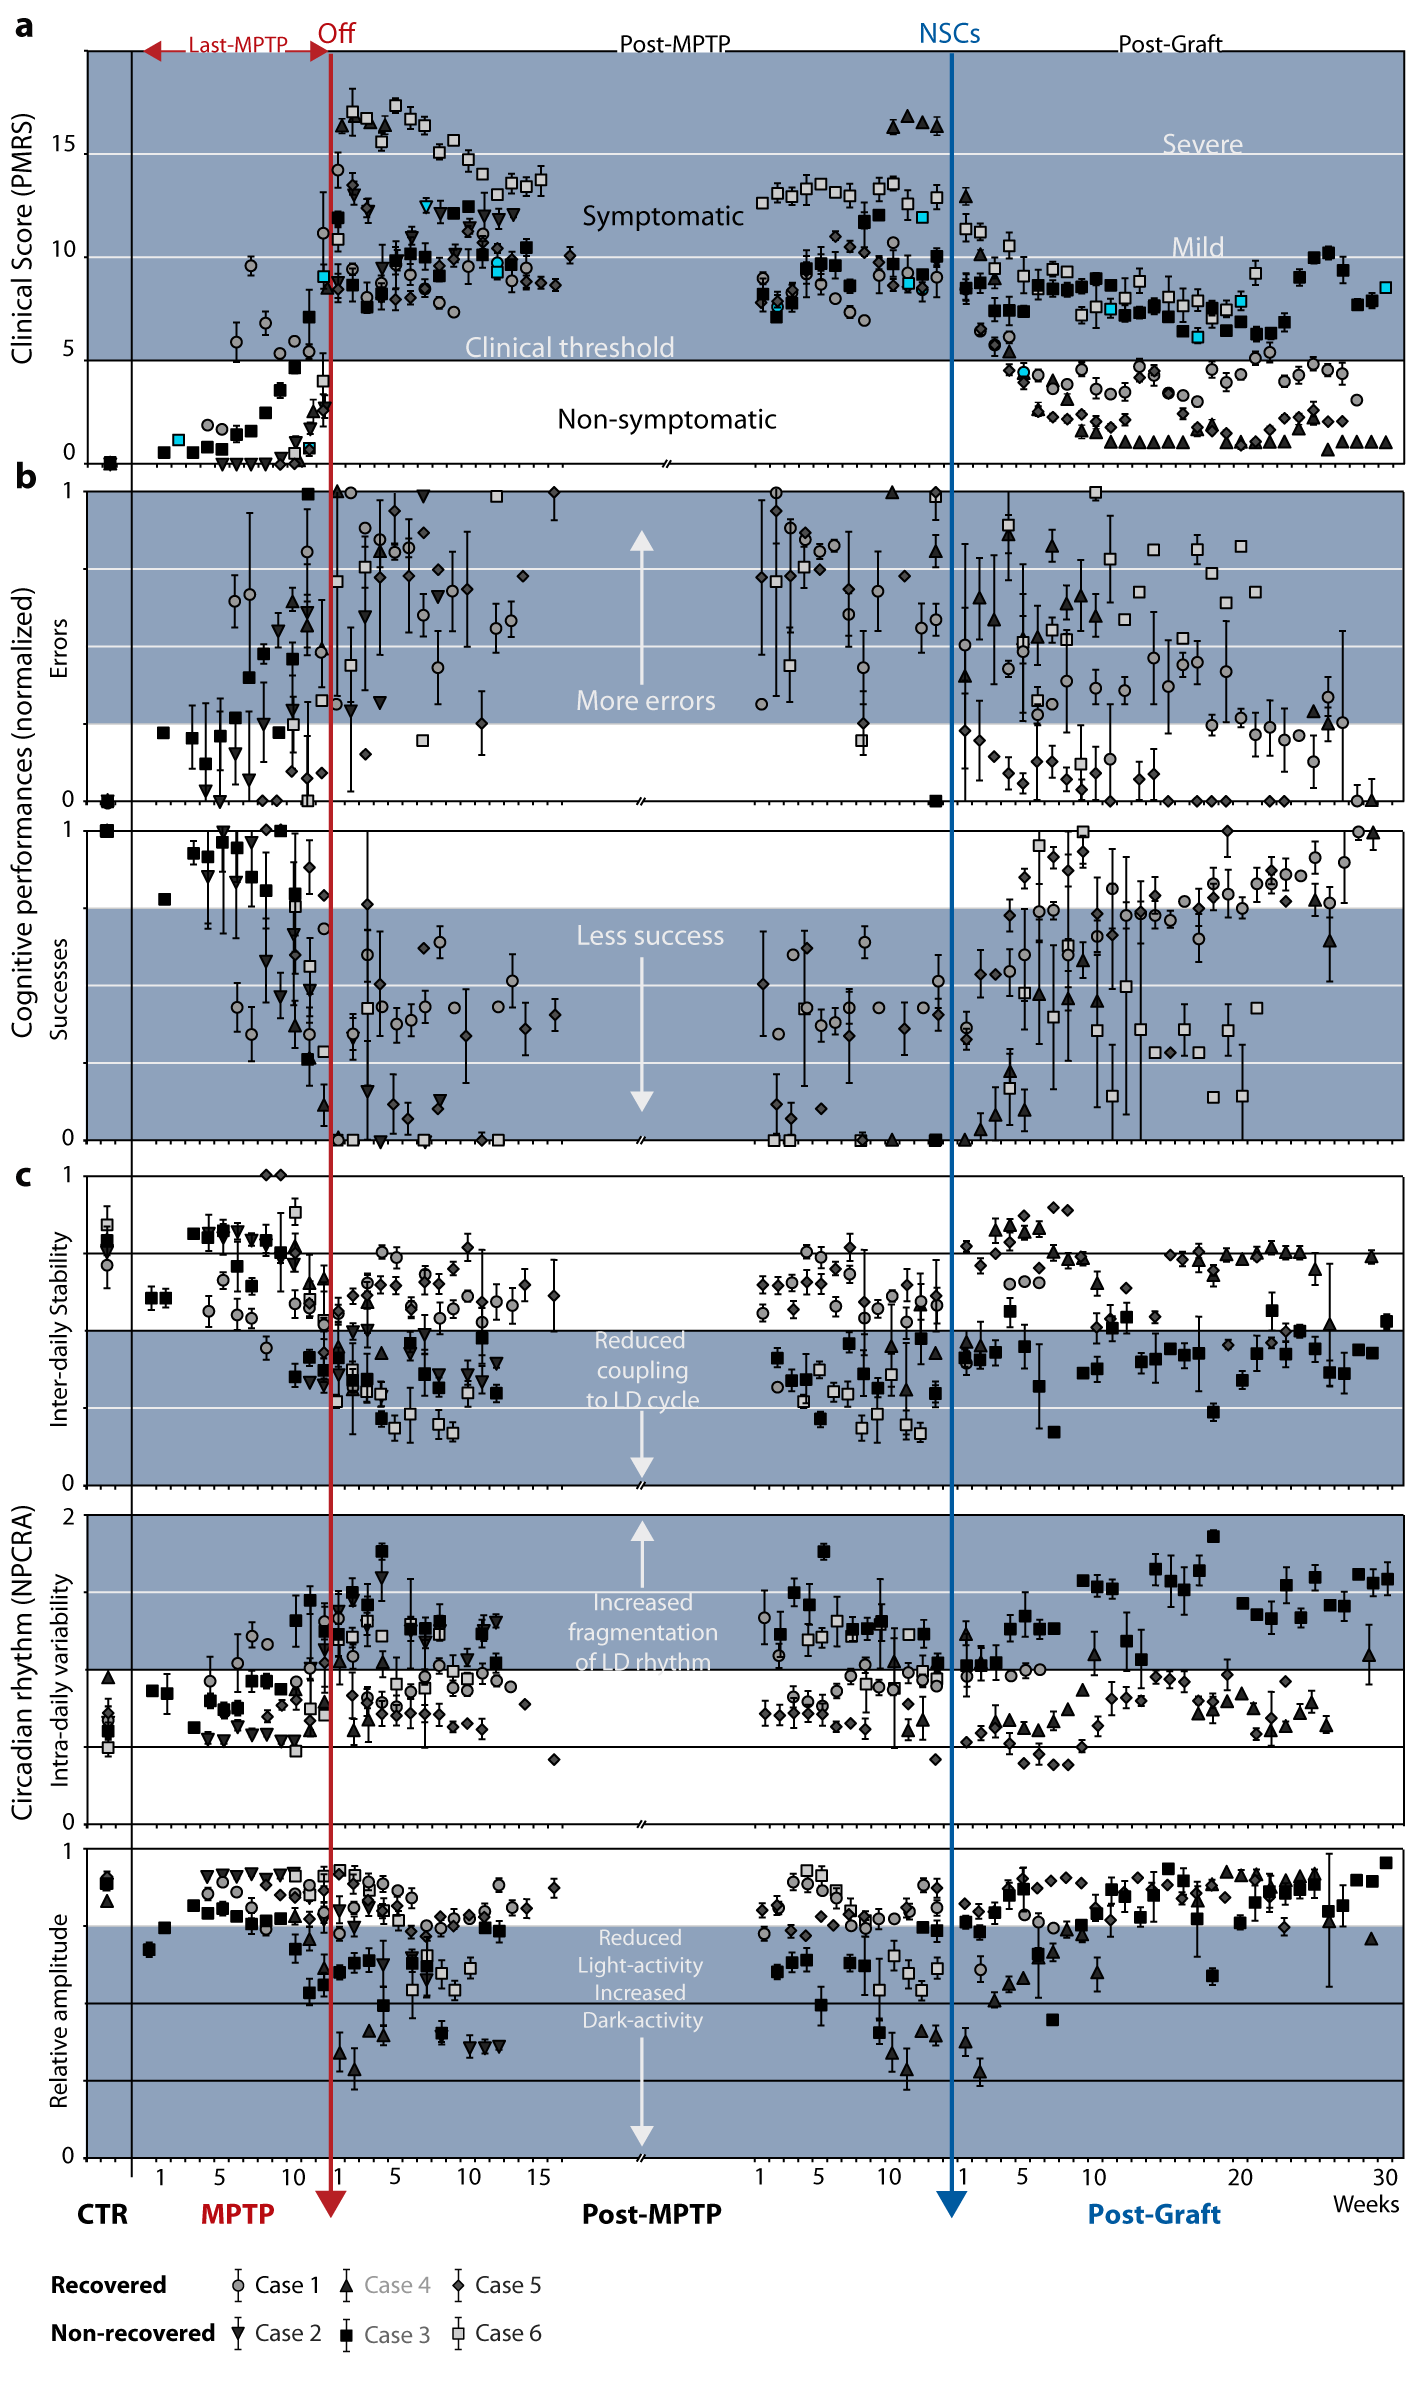


Extended Data Fig.1: Individual follow-up of behavioral and clinical markers

­Motor and non-motor behavioral markers per case (legend down left) after alignment to MPTP offset (red line) and NSC graft (blue line). **a** Clinical motor score, a score ≥ 5 (clinical threshold) indicates symptomatic state corresponding to clinical diagnosis for PD patients. **b** Cognitive performances (Errors – up and Successes – down at the object retrieval detour task, see Methods for details), normalized by min-max per case. **c** Non-parametric Circadian Rhythm Analysis (NPCRA). Mean ±SEM. Markers colored in blue in panel a when PET-scan measures were acquired (day of measure excluded from weekly average).


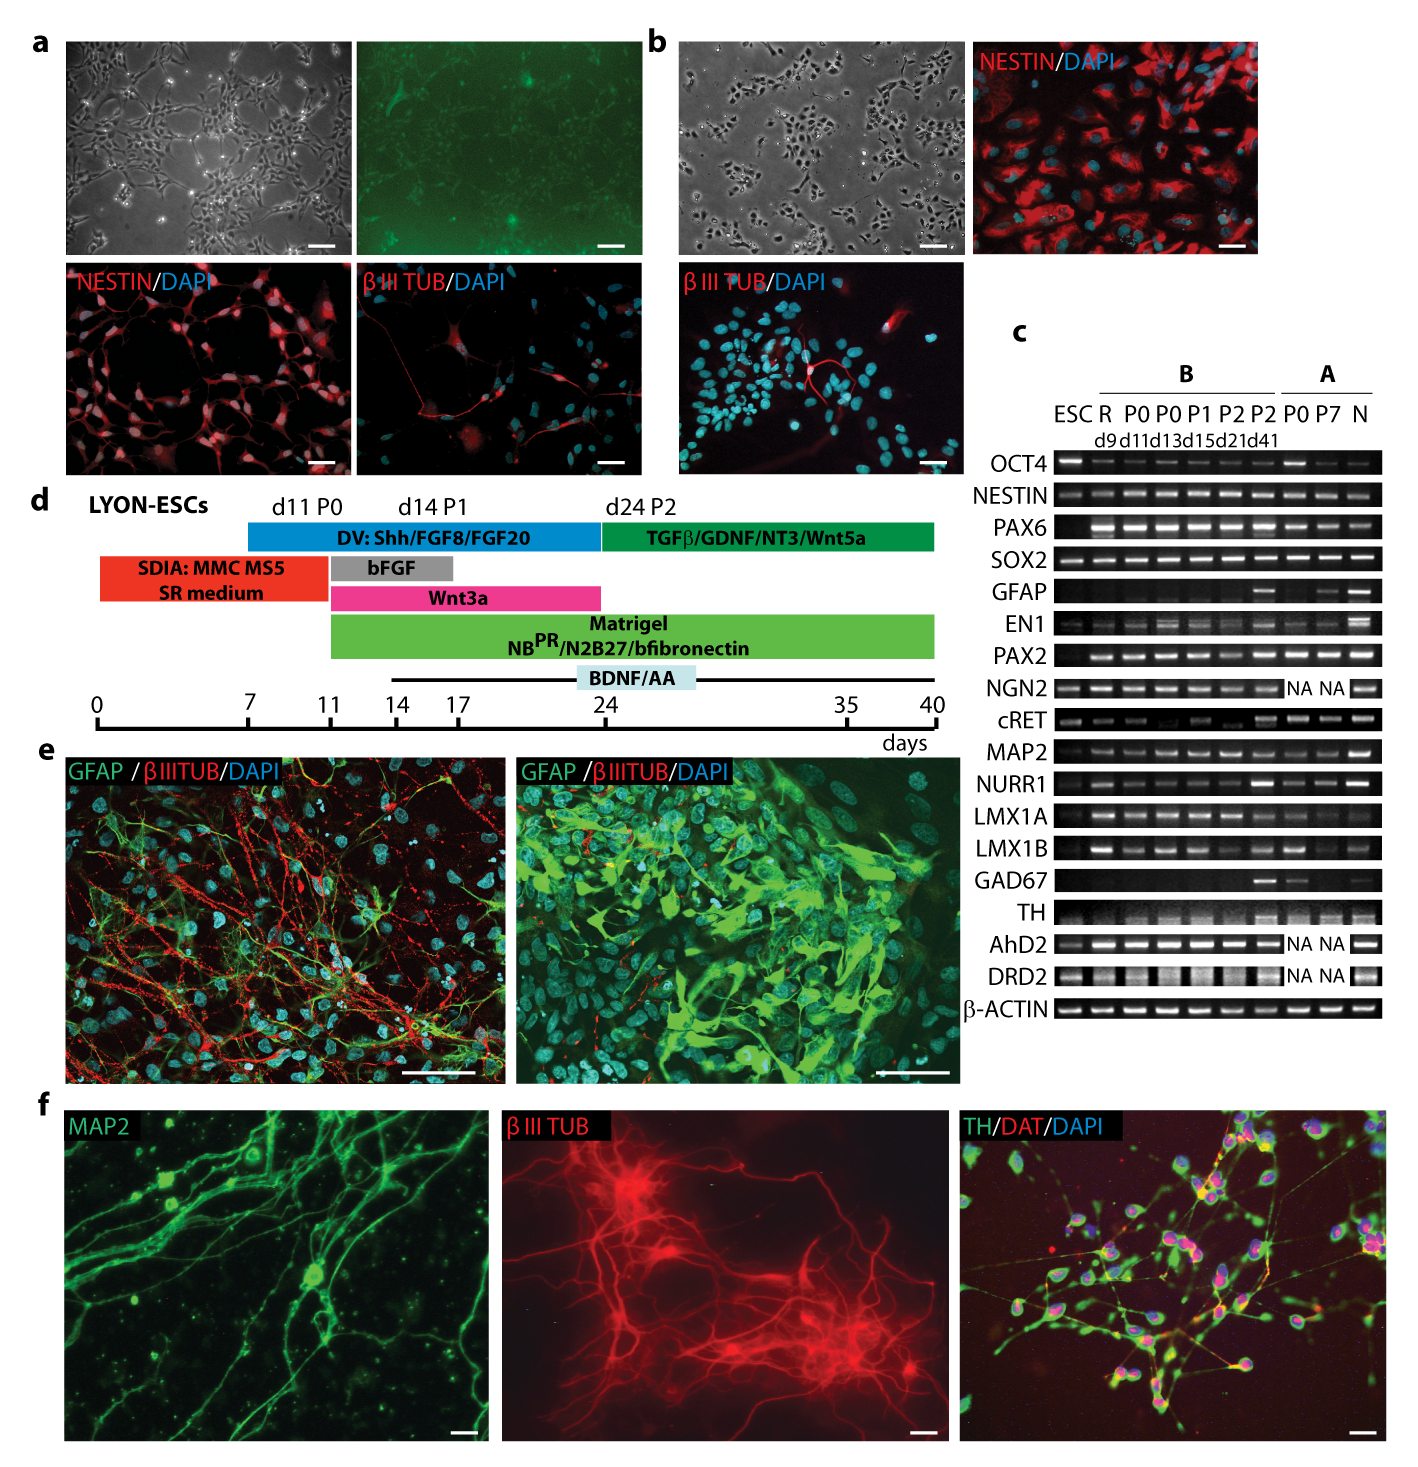


Extended Data Fig.2: Characterization and *in-vitro* differentiation potential of monkey NSCs

NSCs derived from the rhesus LYON-ES cell line (ESC) stably expressing tau-GFP, either after amplification in culture (4th passage, P4), or isolated from rosettes (P1 day17) (**a**, up-left phase contrast, up-right fluorescence view; scale bars up 50μm, down 20μm) or (**b**, up-left phase contrast; scale bars up-left 50μm, up-right and down 20μm). **c** RT-PCR analysis of specific gene markers in ESCs and NSCs across different midbrain differentiation stages of NSCs shown in B, and in NSCs at P0 and P7 shown in A. *e.g.* NSCs- (NESTIN, SOX2, PAX6), glial- (GFAP), early neuronal- (MAP2ab) and DA-specific markers (TH, LMX1B, NURR1). **d** Protocol used to derive NP at P1 (shown in B), and to induce DA differentiation (shown in F). **e** In-vitro, NSCs from type A were able to differentiate in glial (right, GFAP+) and neuronal pathways (left, βIIITUB+); scale bars 50μm. **f** NSCs at P2 day40 according to protocol described in e and showing in-vitro potential for neuronal fate (left and middle) and especially toward DA fate (right, co-expressing DAT and TH); scale bars 10μm. Abbreviations: AA, ascorbic acid; d, day; DV, dorsoventralization; MMC, mitomycin; N, neuronal differentiation of NSCs; NB, neurobasal medium; P, Passage; SR, serum; IIITUB; III-TUBULIN.


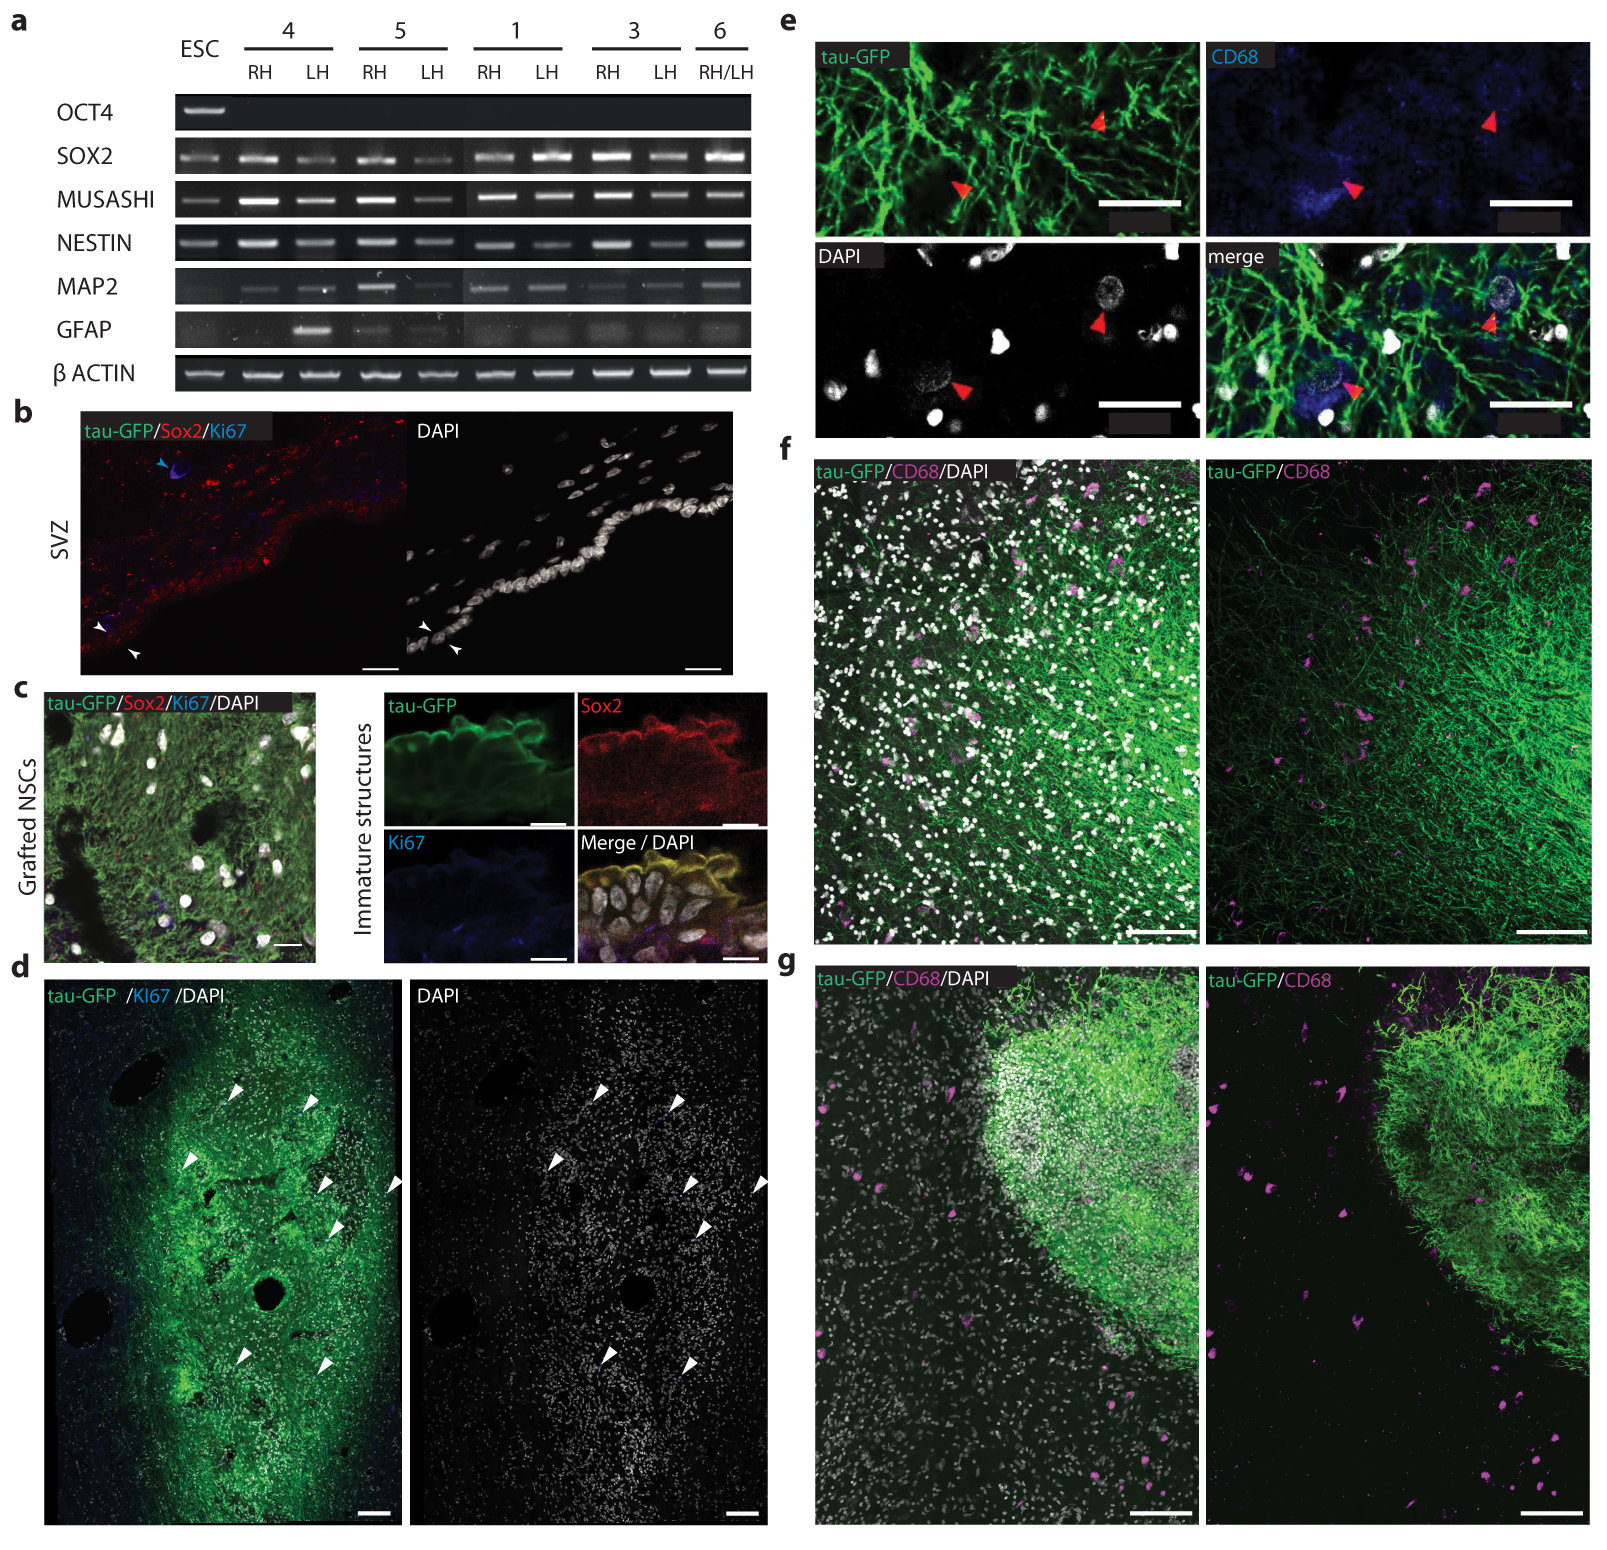


Extended Data Fig.3: NSCs show no overgrowth after graft

**a** RT-PCR analysis of marker genes in NSCs at the time they were grafted for each different case (see Methods and Table S1 for more details) and comparison to ESCs. **b** Typical sub-ventricular zone (SVZ, white arrowheads) section (case 5) displaying some proliferation (Ki67+, blue arrowhead) and NSCs (SOX2+) markers, white bar 20μm. **c** Case5. Left, post-mortem immunostaining showing that no more NSCs remain after graft (SOX2-) from the tau-GFP+ population (in green) which neither shows sign of proliferation (Ki67-); scale bar 13μm. Right, section at the level of a structure exhibiting an immature morphology which was howevernegative for SOX2- and Ki67-; scale bar 10μm. **d** Few scattered Ki67+ and tau-GFP+ cells (arrowheads) were observed in Case5, scale bar 100μm. **e-g** Few activated macrophages (**e** red arrowheads, CD68+) were present near grafted sites like presented here for SN graft sites in cases 5 (**e** and **f**) and 4 (**g**); scale bars **e** 30μm, **f-g** 100μm.


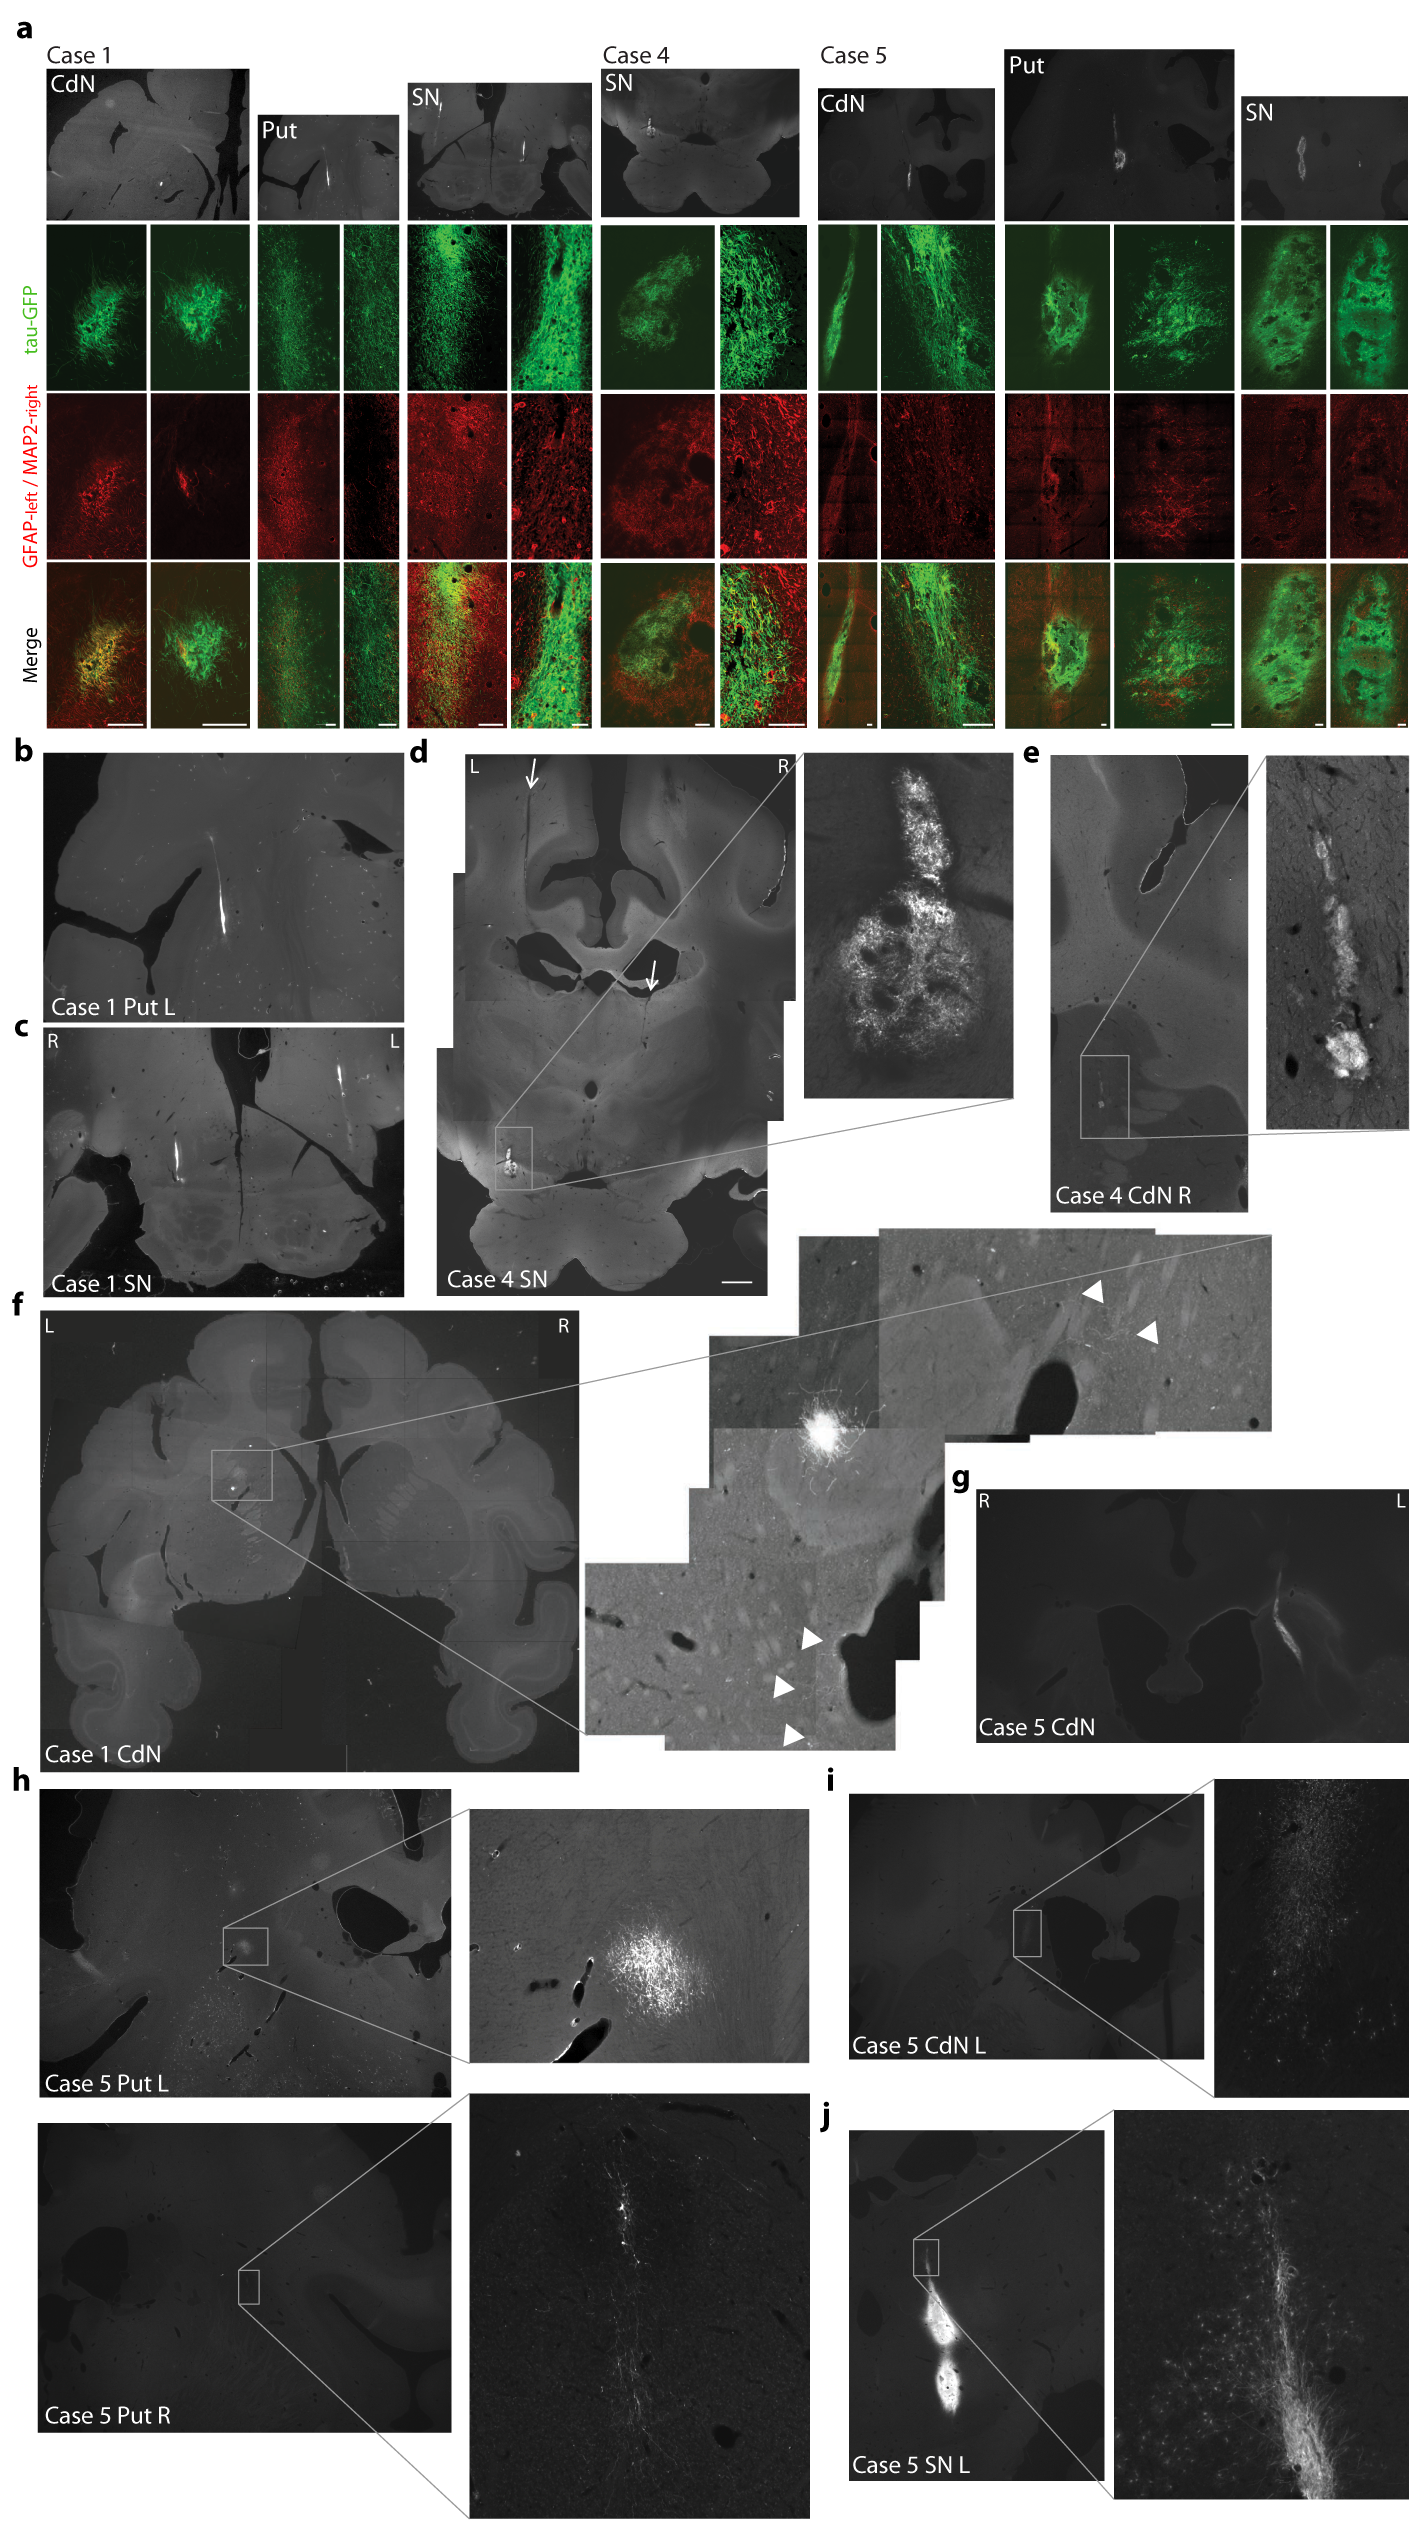


Extended Data Fig.4: Post-mortem localization of graft placement

**a** Different immunofluorescence labeling at grafted sites. Scale bars, 100μm **b-j** Illustration of NSC-graft locations and features (tau-GFP in white). Arrows in b (scale bar, 2mm) show needle penetration traces for SN grafts. Arrowheads in f show distant tau-GFP positive dendrites.


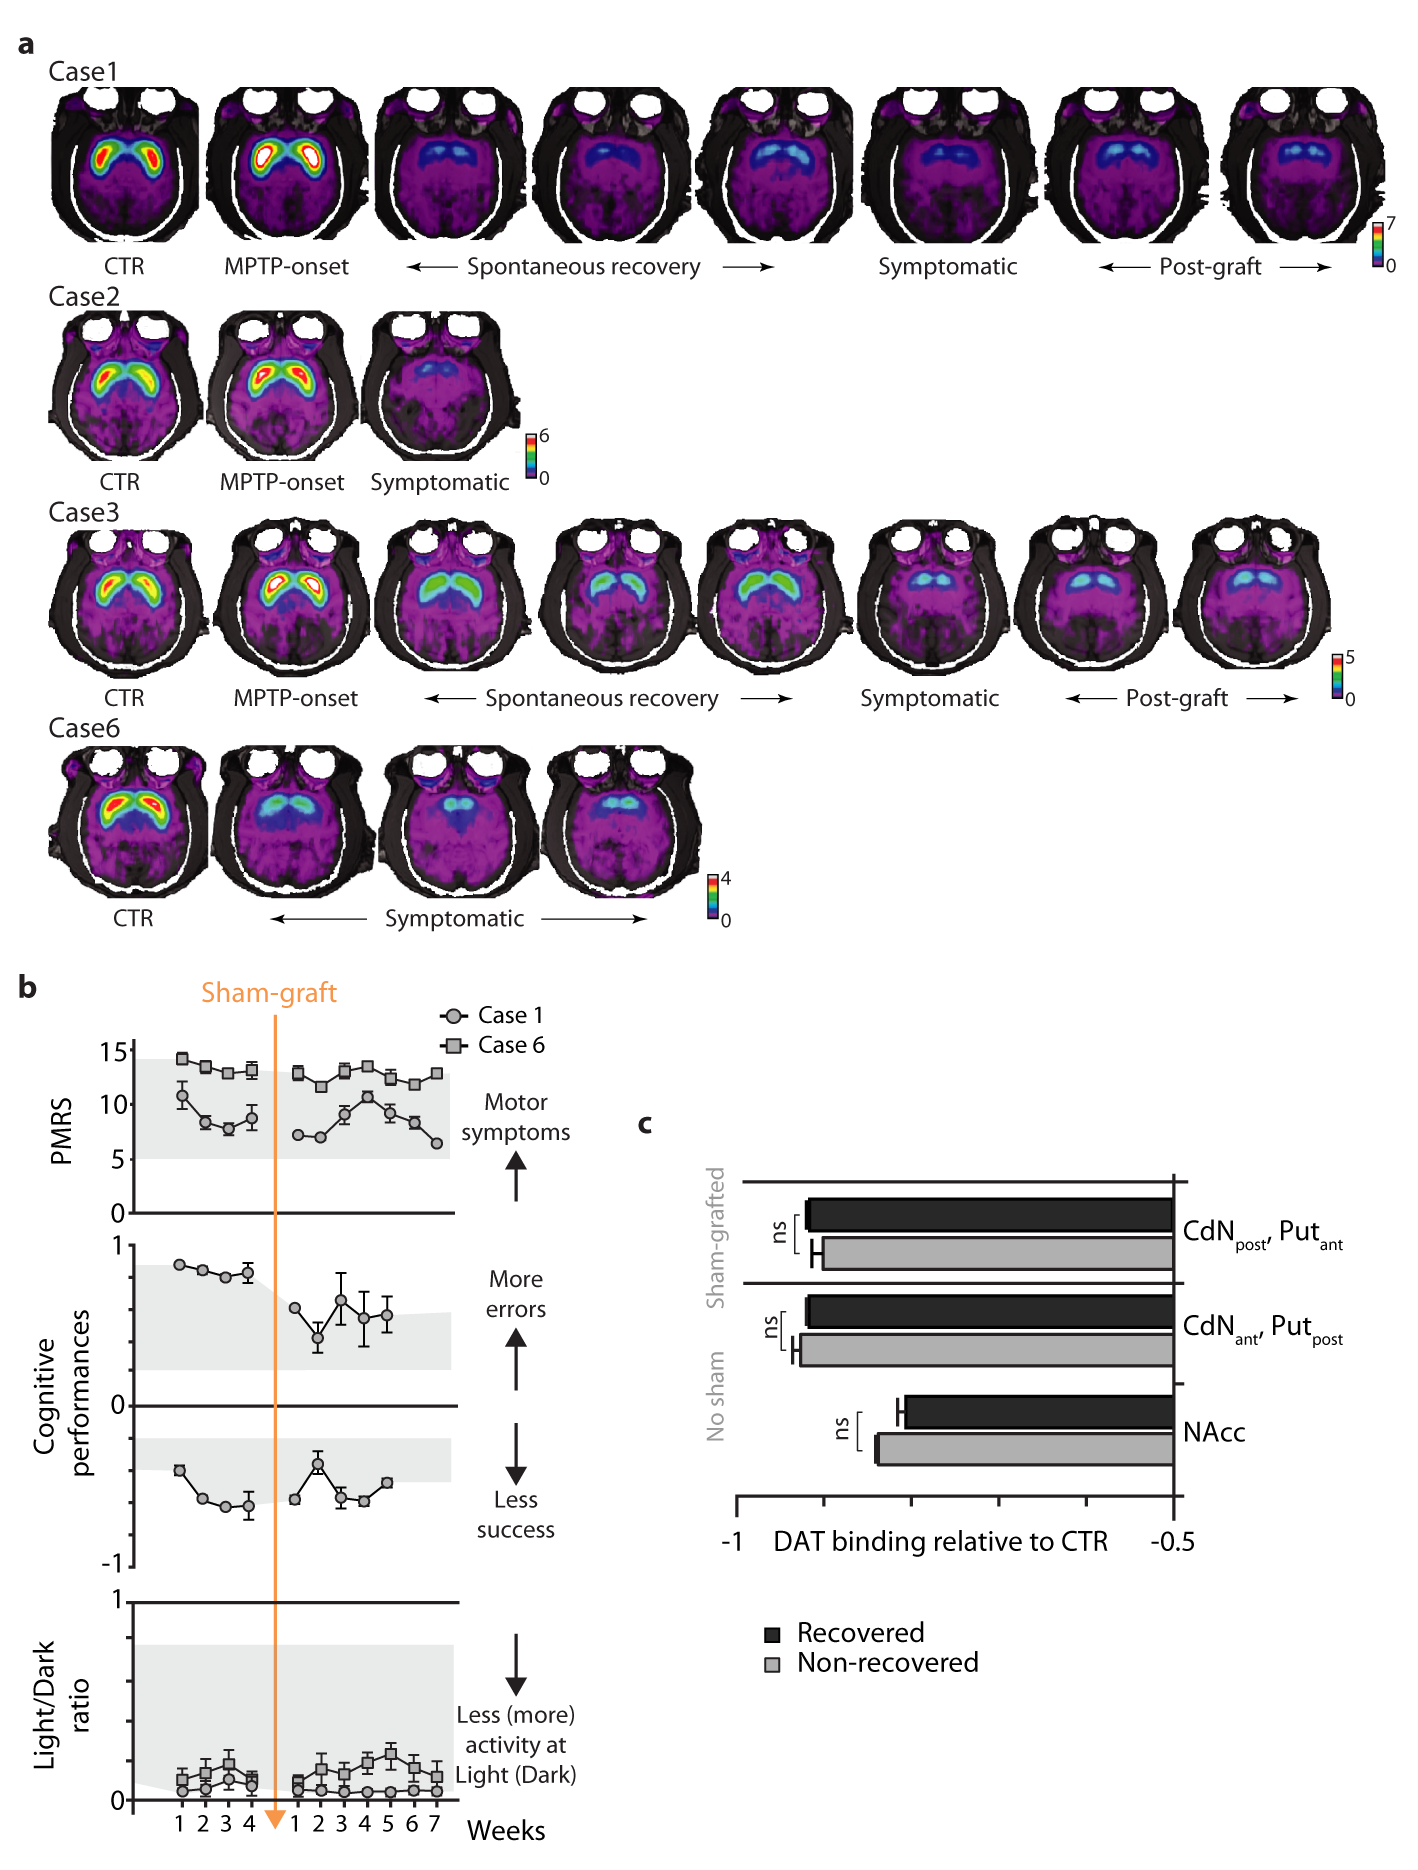


Extended Data Fig.5: Functional follow-up of DAT binding and Sham-grafts consequences on behavioral and functional markers

**a** PET-scan images reconstruction after alignment to individual MRI showing progression of DAT binding from CTR until post-Graft. **b** Sham-grafts, performed in cases 1 and 6, show no effect on behavioral improvement. From top to down, clinical motor score – PMRS, cognitive performances (errors – up, successes – down) and Light/Dark ratio. **C** PET-scans of 11C-PE2I (relative change compared to CTR) show no difference in DAT binding following Sham-graft between recovered (case1) vs. non-recovered (case 6).


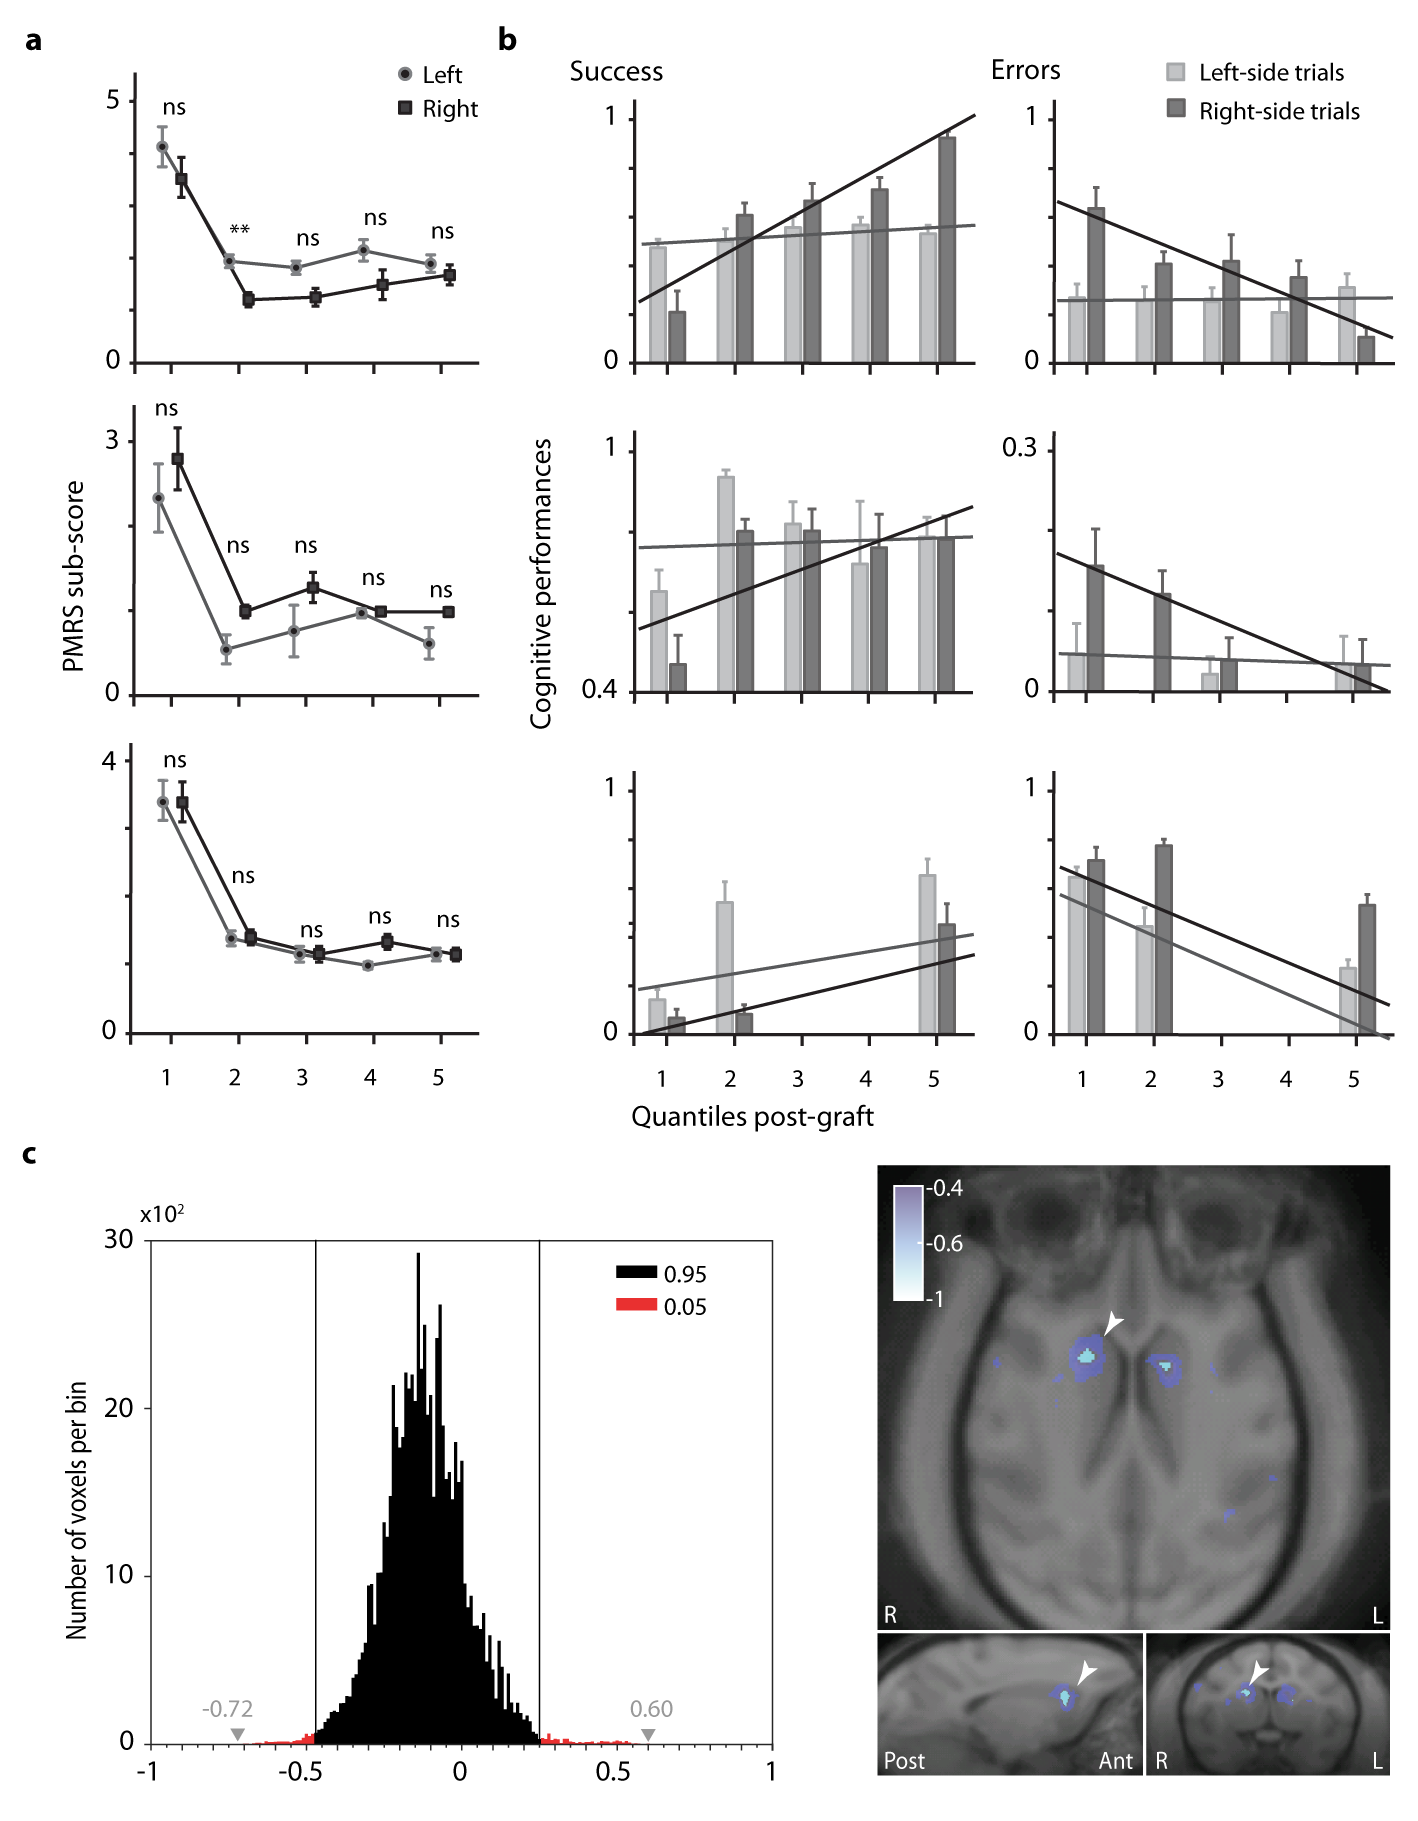


Extended Data Fig.6: Hemispheric differences in graft-induced recovery

**a** Evolution of clinical sub-score in quantiles post-graft. Average sum of score for resting tremor, ability to manipulate food, lower and upper limb movements for case1 (top), case5 (middle) and case4 (bottom) separately scored for left (in grey) and right limbs (in black).Note that no clear difference could be related to NSCs survival in left vs. right hemisphere. Unilateral survival in posterior Putamen and bilateral survival in substantia nigra for case1 whereas case5 presented unilateral survival in substantia nigra and bilateral survival in posterior putamen (see Extended Data Table 4).**p<0.001, ns p>alpha (Bonferroni corrected alpha=0.01, two-sample t-test assuming unequal variance). **b** Cognitive performances evolution in quantiles post-graft. Lines represent linear regression of average performances per quantile for left (grey lines) and right (black lines) trials separately. Recovery is characterized by an increase in Success and a decrease in Errors. Note the time-course asymmetry of recovery for cases 1 and 5 (top and middle row) and parallel time-course for case 4 (bottom row) when comparing left vs. right trials. Cases 1 and 5 presented unilateral survival whereas case4 presented bilateral survival in the anterior caudate nucleus (see Extended Data Table 4). Mean ± SE across quantiles. **c** The distribution of difference values of voxel-level BPND Pre- vs. Post-graft, over all brain ROIs was used to calculate the 2.5th and 97.5th percentile boundaries (case1, vertical lines, -0.48 and +0.26 respectively). Grey arrowheads indicates min and max difference bins. Corresponding statistical thresholding of negative difference (right), note the minor but significant decrease in right anterior caudate nucleus (arrowheads). Positive difference in Fig.1d.


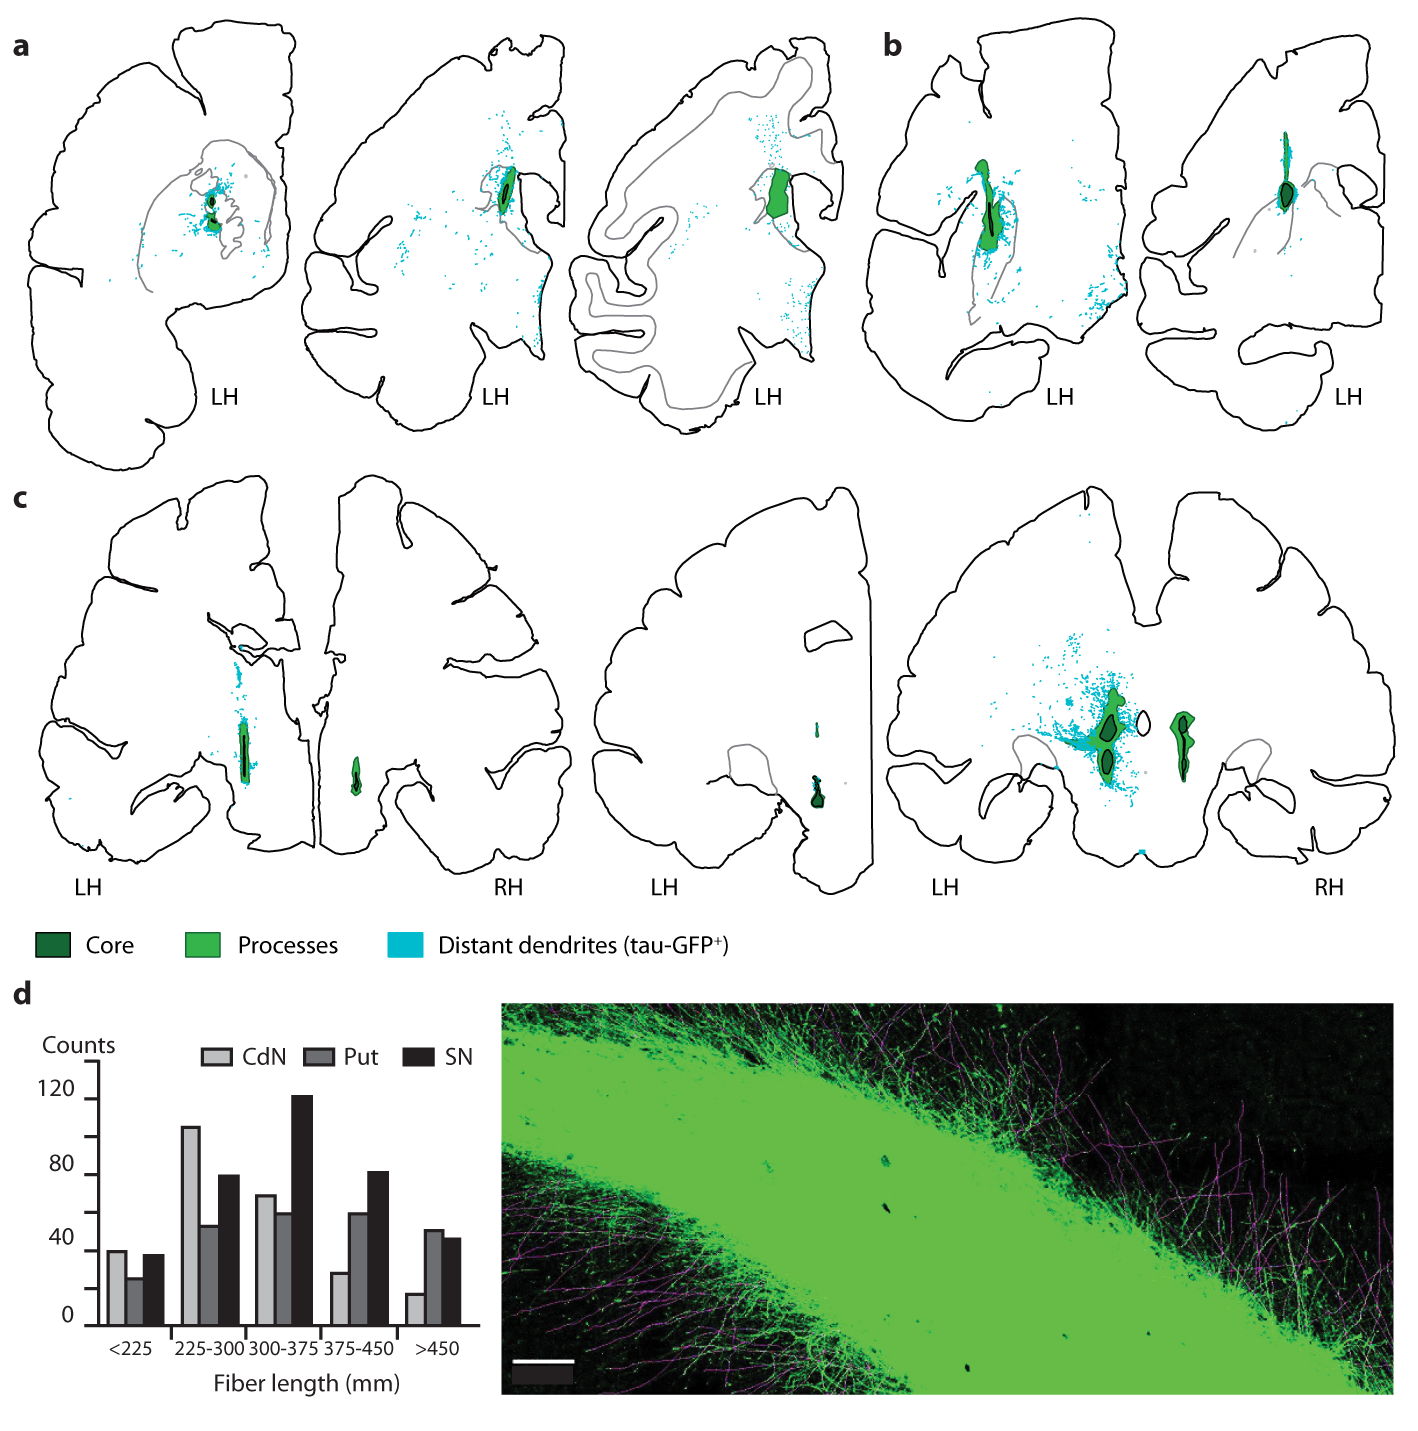


Extended Data Fig.7: Grafted NSCs project over long distances

Digital reconstructions of NSCs grafts of post-mortem brain slices at the level of, **a** anterior Caudate Nucleus for case1 (left) and case5 (middle and right), **b** Posterior Putamen for cases 1 and 5 (from left to right). **C** At the level of substantia nigra for cases 1, 4 and 5 (from left to right). Several tau-GFP+ dendrites (in clear blue) are found at relatively distant locations from the graft core (in dark green), much farther than immediate graft processes (in clear green) emanating from the core. **d** Typical processes emanating from the core have an average length superior to 340μm. Left, count histogram of processes’ length for case5. Right, typical tau-GFP+ picture showing graft-core and processes at the level of CdN, case 5. Purple lines are measurement overlay. Scale bar, 200μm.


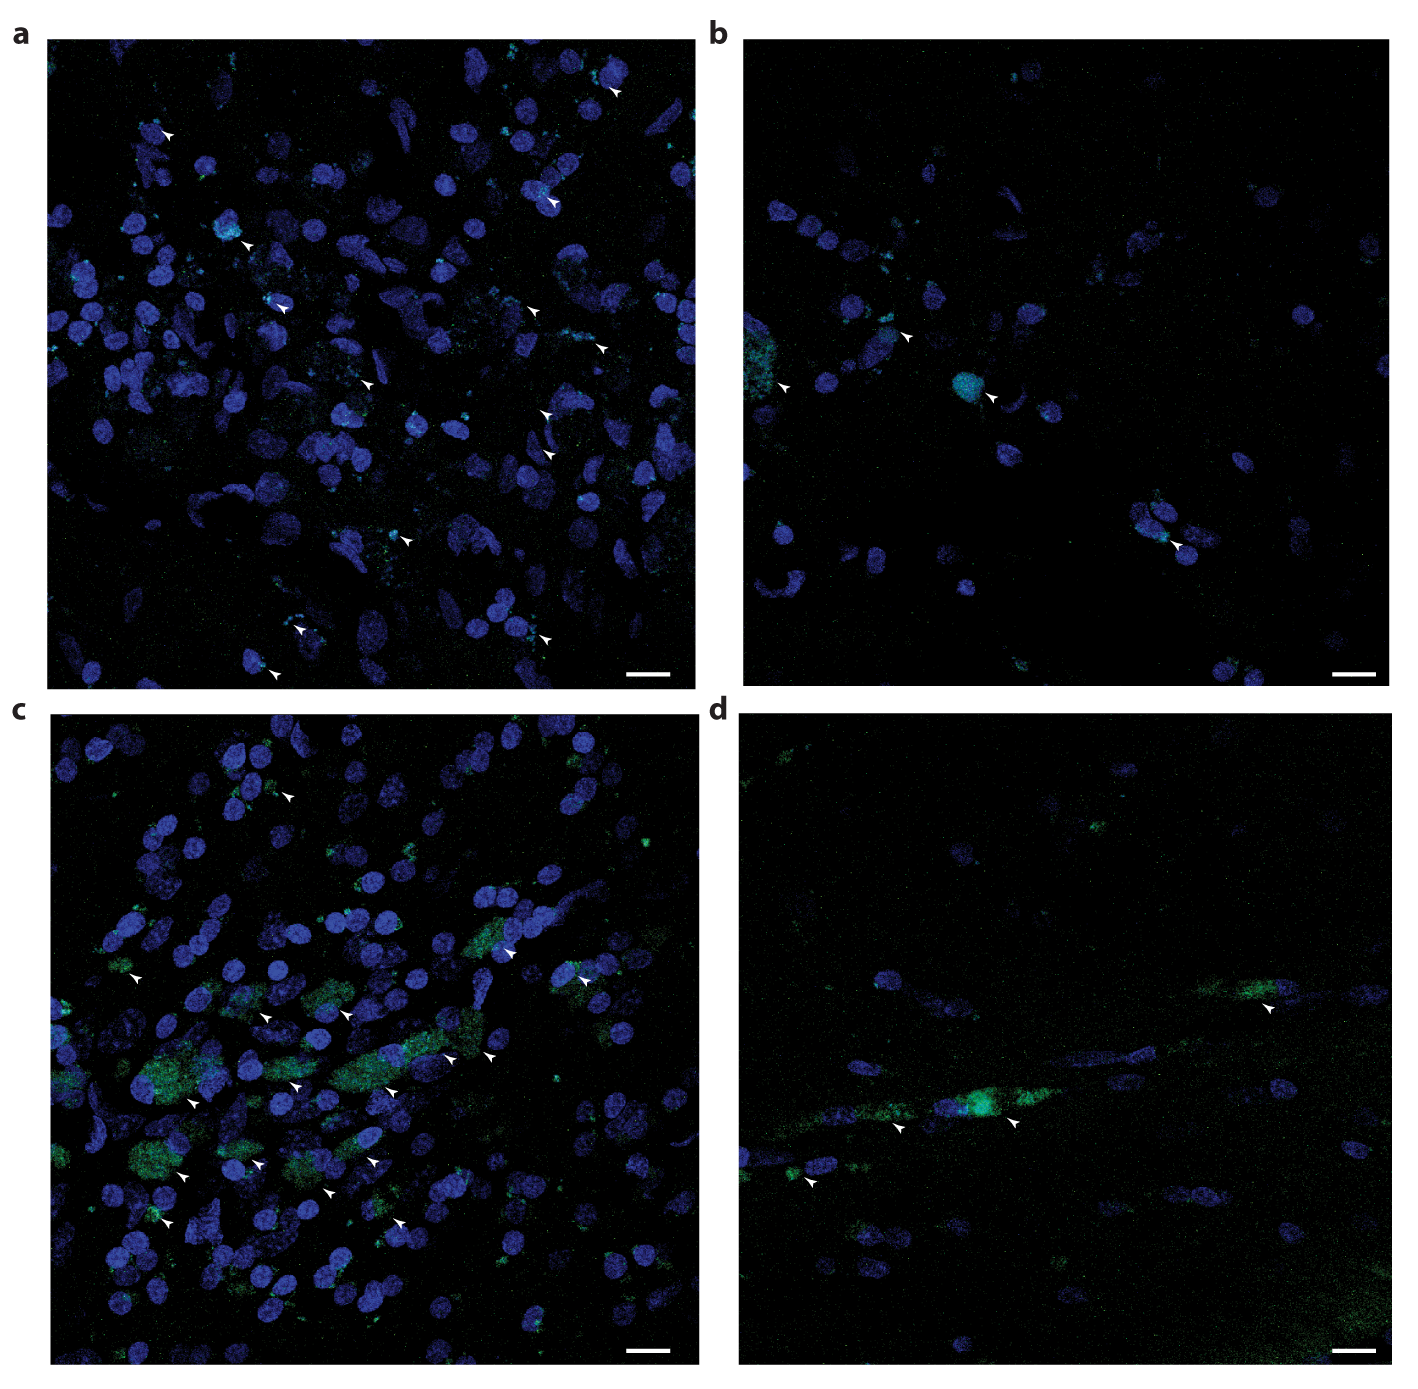


Extended Data Fig.8: Grafted NSCs did not survive in the non-recovered group

**a-d** tau-GFP (green) and ToPro3 (blue) immunolabeling of SN in case 6 of the non-recovered group show only cell debris (arrowheads) surrounded by weak and diffuse GFP staining.

Extended Data Table 1: Longitudinal protocol design, repeated measures and case controls

| Reference study | Protocol’s Subparts | Neuroscience Disciplines | present study cases | Total number of NHPs used |
| --- | --- | --- | --- | --- |
| Wianny et al.,2008 *Stem Cells* *(19)*  Wianny et al.,2011 *Differentiation* *(15)* | ESCs line production and NSCs derivation | Stem Cells Neurobiology | - | - |
| Vezoli et al., 2011 *PLoS ONE* *(16)* | CTR; MPTP; Spontaneous Recovery | Neurobiology of Sleep and Circadian Rhythms; Cognitive Neurobiology; Clinical Neuroscience; Neurological Disease Models | 1, 2, 4 | 3 + monkey T |
| Vezoli et al., 2011 *NeuroImage* *(17)* | CTR; MPTP; Spontaneous Recovery; Stable Symptoms | Neurobiology of Sleep and Circadian Rhythms; Cognitive Neurobiology; Clinical Neuroscience; Neuroimaging and Systems Neuroscience; Neuroanatomy; Neurological Disease Models | 1, 2, 3, 6 | 4 |
| Fifel et al., 2014 *PLoS ONE* *(13)* | CTR; MPTP; Spontaneous Recovery; Stable Symptoms | Neurobiology of Sleep and Circadian Rhythms; Clinical Neuroscience; Neuroanatomy; Neurobiology of Disease | 1-6 | 6 + monkeys B, C, J, R, V |
| present study | CTR; MPTP; Spontaneous Recovery; Stable Symptoms; Pre- vs. Post-Graft | Neurobiology of Sleep and Circadian Rhythms; Cognitive Neurobiology; Clinical Neuroscience; Neuroimaging; Anatomy and Histology; Neurobiology of Disease; Stem Cells Neurobiology; Translational Neuroscience | 1-6  3 additional control cases | 6 + 3 |

Control procedures detailed in reference to the associated study, identification of the cases used in the present study and the total number of animals used per study. Overall 15 different NHPs were involved in the longitudinal protocol design.

Extended Data Table 2: Type and number of transplanted cells per site

|  | Caudate Nucleus ant. | | Putamen post. | | Substantia Nigra | |
| --- | --- | --- | --- | --- | --- | --- |
|  | Left | Right | Left | Right | Left | Right |
| CASE 1 | 1.5 105 [P6] | 1.5 105 [P5] | 1.5 105 [P6] | 1.5 105 [P5] | 3 105 [P6] | 3 105 [P5] |
| CASE 2 | 1.5 105 [P7] | 1.5 105 [P1d15] | 1.5 105 [P7] | 1.5 105 [P1d15] | 3 105 [P7] | 3 105 [P1d15] |
| CASE 3 | 1.5 105 [P6] | 1.5 105 [P1d18] | 1.5 105 [P6] | 1.5 105 [P1d18] | 3 105 [P6] | 3 105 [P1d18] |
| CASE 4 | 1 106 [P6] | 1 106 [P1d17] | - | - | 1 106 [P6] | 1 106 [P1d17] |
| CASE 5 | 1.5 105 [P7] | 1.5 105 [P1d15] | 1.5 105 [P7] | 1.5 105 [P1d15] | 3 105 [P7] | 3 105 [P1d15] |
| CASE 6 | 5 105 [P9] | 5 105 [P9] | 5 105 [P9] | 5 105 [P9] | 1 106 [P9] | 1 106 [P9] |

NSCs were transplanted bilaterally in the caudate nucleus, putamen and substantia nigra. In the left hemisphere, NSCs were transplanted (between P5 and P9) (**Extended Data** **Fig.2C**). In the right hemisphere NSCs isolated from rosettes (following seeding on MS5 stromal cells) were transplanted 15-18 days after P1. In case 4, ventral midbrain differentiation was induced by SHH/FGF8/FGF20 treatment for 17 days before transplantation (**Extended Data** **Fig.2D**). P, passage; SHH, sonic hedgehog; FGF, Fibroblast Growth Factor. Type of cell specified between square-brackets.

Extended Data Table 3: Total cumulated MPTP doses per case

| CASE 1 | 7.8 mg/kg (27 inj. SP and 12 inj. acute, 3months) |
| --- | --- |
| CASE 2 | 4.4 mg/kg (22 inj. SP/acute) |
| CASE 3 | 4.8 mg/kg (8 inj. SP and 16 inj. SP/acute, 5months) |
| CASE 4 | 4.4 mg/kg (11 inj. SP and 11 inj. acute, 26months) |
| CASE 5 | 3.0 mg/kg (15 inj. SP/acute) |
| CASE 6 | 2.4 mg/kg (12 inj. acute) |

In cases 1, 3 and 4 MPTP intoxication was implemented in 2 phases with the first one consisting in chronic low-doses systemic injections (interval of at least 72-96H between injections (inj.), slowly progressive lesion (SP) that was halted in order to promote spontaneous recovery from motor symptoms. In all cases, MPTP intoxication ended after a period of acute low-doses injections (interval of 24h between injections). Time period between two MPTP intoxication periods indicated in months.

**Extended Data Table 4: Graft volume estimates and cell survival in recovered cases**

|  |  |  | Caudate Nucleus | Putamen | Substantia Nigra |
| --- | --- | --- | --- | --- | --- |
| CASE 1 | LH | Graft core | 0.046 [3,150] | 0.07 [47,700] | 0.31 [30,300] |
| Total | 0.29 mm3 | 1.65 mm3 | 2.96 mm3 |
| RH | Graft core | - [0] | - [0] | 0.12 [31,200] |
| Total | 1.26 mm3 |
| CASE 4 | LH | Graft core | 0.0156 [5,000] | NA | 0.49 [110,000] |
| Total | 0.016 mm3 | 0.54 mm3 |
| RH | Graft core | 0.0104 [9,000] | NA | - [ND*] |
| Total | 0.01 mm3 |
| CASE 5 | LH | Graft core | 0.3 [56,700] | 0.62 [25,200] | 3.42 [184,200] |
| Total | 3.66 mm3 | 1.91 mm3 | 11.2 mm3 |
| RH | Graft core | - [0] | 0.017 [4 950] | 0.69 [NA] |
| Total | 0.22 mm3 | 2.87 mm3 |

Total graft volume estimates include maximal visible length of processes emanating from the graft core (in mm3). Number of surviving cells estimates in brackets (based on graft core volume, cell density and number of grafted cells in Table S2). ND: not determined. NA: not applicable. *few cells detected

**Extended Data Table 5: Antibodies list.**

| Name | Supplier | Reference |
| --- | --- | --- |
| Rabbit anti-GFAP | Dako | Z0334 |
| Chicken anti-GFP | Life Technologies | A10262 |
| Mouse anti-MAP2 | SIGMA | M4403 |
| Mouse anti-NESTIN | Millipore | MAB5326 |
| Mouse Tuj1 | SIGMA | T8660 |
| Goat anti-SOX2 | Santa Cruz | sc-17320 |
| Rabbit anti-Ki67 | Thermo scientific | RM-9106 |
| Goat anti-GDNF | R&D systems | AF-212-NA* |
| Mouse anti-CD68 | R&D systems | MAB 20401 |
| Rabbit anti-SYNUCLEIN | ProteinTech | 17785-1-AP |
| Rabbit anti-Tyrosine Hydroxylase | Chemicon | VPA151 |
| Mouse anti- Tyrosine Hydroxylase | Millipore | MAB318 |
| Rat anti-dopamine transporter (DAT) | Millipore | MAB369 |
| Rabbit anti-serotonin ­transporter (SERT) | Millipore | AB9322 |
| Goat anti-Chicken alexa 488 | Life Technologies | A11039 |
| Goat anti-Mouse alexa 647 | Life Technologies | A21235 |
| Goat anti-Rabbit alexa 555 | Life Technologies | A21428 |
| Donkey anti-Goat alexa 555 | Life Technologies | A21432 |
| Donkey anti-Rabbit alexa 647 | Life Technologies | A31373 |
| Donkey anti-Rabbit alexa 555 | Life Technologies | A31572 |
| Donkey anti-Mouse alexa 647 | Life Technologies | A31571 |
| Donkey anti-Chicken dylight 488 | Jackson | 703-485-155 |
| *not shown in results | | |

**Extended Data Table 6: Primers for semi-quantitative RT-PCR.**

| Gene | Forward Primer (5’-3’) | Reverse Primer (5’-3’) |
| --- | --- | --- |
|  actin | AAACTGGAACGGTGAAGGTG | TCAAGTTGGGGGACAAAAAGG |
| AhD2 | GTTGTCAAACCAGCAGAGCA | CAAGTCGGCATCAGCTAACA |
| DRD2 | GGAGGTGGTAGGTGAGTGGA | GGAGATGGTGAAGGACAGGA |
| EN1 | CTAGCCAAACCGCTTACGAC | GCAGAACAGACAGACCGACA |
| GAD67 | ATTCTTGAAGCCAAACAG | TAGCTTTTCCCGTCGTTG |
| GFAP | Ggcagggcatgactttgttc | Taagaagggaccgcaagagg |
| LMX1A | CCTGCAGGAAGGTGAGAGAG | GTCGTCGCTATCCAGGTCAT |
| LMX1B | GCAGCGGCTGCATGGAGAAGATCGC | GGTTCTGAAACCAGACCTGGACAAC |
| MAP2 | CAGCAAAGGGATACTTTCAC | ATGCTTTTTGTTGCTTCTTC |
| MUSASHI | cgagctcgactccaaaacaatt | tctacacggaattcggggaact |
| NESTIN | cgtcttggatctttgctccc | gggctctgatctctgcatct |
| NGN2 | CCGAGACCTTGGAGTTGAAG | CGTTTGCAATCGTGTACCAG |
| NURR1 | CTCCCAGAGGGAACTGCACTTCG | CTCTGGAGTTAAGAAATCGGAGCTG |
| PAX2 | TGTGTCAGCAAAATCCTGGGCAGGT | TGCTGAACTTTGGTCCGGATGAT |
| PAX6 | CATGCAGAACAGTCACAGCGG | CCCATCTGTTGCTTTTCGCTA |
| SOX2 | cccccggcggcaatagca | tcggcgccggggagatacat |
| TH | ATGGCTGAGCCCCGCCAGGAG | TCACAAACCCTGCTTGGCC |
| c-RET | CGACCTCATCTCATTTGCC | AATCTTCATCTTCCGCCCC |
